# Supplementary material
Source: publisher figshare collection journal article supplement (https://brill.figshare.com/ndownloader/files/13726088)
Supplement: Supplementary file 1 [file 13726088]

Short Census c’td.

[This list is a brief and summary continuation of *Cicero Rhetor: a Census of medieval and Renaissance Manuscripts*containing texts of, and/or glosses, commentaries, notes on, or *accessus* (introductions) etc. to, Cicero's *De inventione* and the *Rhetorica ad Herennium*, together with certain related texts:

**[A] Summary Key Works Short-title Manuscript Catalogue by Serial Number**

It carries only:

**Town**

**Library (abbrev)**

**Shelf Mk (abbrev) and date**

Rhet items in order in MS w/out fols and following style of fuller Sht Census, with author where relevant. An attempt has been made to make the list as complete as possible, but time has prevented bringing it into full conformity with the first part of the ‘Census’]

**Firenze**

Riccardiana [no cards in metal drawers? ON 1986 (1) (2) (3) good on these MSS: check for later write-ups; checked for this project]

**349 xv**

[Ad Her] acc

**Firenze**

**Riccardiana**

**512 xiv-xv**

Ad Her

[Ad Her] mi-gl

**Firenze**

**Riccardiana**

**519 xv**

De inv

[De inv] s-gl

**Firenze**

**Riccardiana**

**572 xv**

Ad Her

[Ad Her] s-gl

**Firenze**

**Riccardiana**

**575 xv**

Ad Her

**Firenze**

**Riccardiana**

**681 xv (1481)**

[Ad Her] comm. (Guarino da Verona)

**Firenze**

**Riccardiana**

**706 xv**

[De inv] comm (Victorinus)

[De inv comm (Victorinus)] s-gl

[De inv] comm E (‘cum sint…’ = MO I #468 p.131)

**Firenze**

**Riccardiana**

**972 xv**

## Ad Her E

[Ad Her] ta

[Ad Her] s-gl

**Firenze**

**Riccardiana**

**973 (N.I.5) xv**

[Ad Her] comm. E

**Firenze**

**Riccardiana**

**1270 xiv-xv**

[Ad Her] trans/para-ital* (Guidotto / Giamboni)

**Firenze**

**Riccardiana**

**1157 xv**

[Ad Her] trans/para-ital* (Guidotto / Giamboni)

**Firenze**

**Riccardiana**

**1159 xv**

[Ad Her] trans/para-ital* (Guidotto / Giamboni)

**Firenze**

**Riccardiana**

**1270 xiv-xv**

[Ad Her] trans/para-ital* (Guidotto / Giamboni)

**Firenze**

**Riccardiana**

**1538 xiv**

[Ad Her] trans/para-ital* (Guidotto / Giamboni)

**Firenze**

**Riccardiana**

**1565 xv**

[Ad Her] trans/para-ital* (Guidotto / Giamboni)

[De inv E] trans/para-ital* (Cox p.158, !2.3)

[De inv E] trans/para-ital* (Cox p.158, !2.2) **??????**

**Firenze**

**Riccardiana**

**1638 xv**

[Ad Her] trans/para-ital* (Guidotto / Giamboni)

**Firenze**

# Riccardiana

**1639 xv**

[Ad Her] trans/para-ital* (Guidotto / Giamboni)

**Firenze**

**Riccardiana**

**1641 xv**

[Ad Her] trans/para-ital* (Scolari - *Trattatello*)

**Firenze**

**Riccardiana**

**1642 xv**

[Ad Her E] trans/para-ital* E (Guidotto / Giamboni, prologue and first chapter only)

**Firenze**

# Riccardiana

**2197 xvi**

[Ad Her] trans/para-ital* (Guidotto / Giamboni)

**Firenze**

**Riccardiana**

**2232 xv**

[Ad Her] trans/para-ital* (Speroni 1973 p.27; p.26: ‘Proprie sulle spoglie del *Fiore* (in quanto ne riprende alcuni capitoli) vede la luce, in pieno Trecento, un volgarizzamento integrale del trattato latino, condotto con grande ricchezza di strumentazione linquistica [soprattutto nei numerosi, e a volte originali, esempi]’)

**Firenze**

**Riccardiana**

**2338 xiv-xv**

[Ad Her] trans/para-ital* (Guidotto / Giamboni)

[De inv E] trans/para-ital*

**Firenze**

**Riccardiana**

**2994 xv**

fols 93r-101v [De inv / Ad Her] abr (? ‘deductio ex Ciceronis Rethorica per Philippum Casalensem de Bononia civem Pistoriensem ad reverendum patrem fratrem Johannem de Pistorio (tile added by another hand) …’; in. ‘Oratoris officium est de iis rebus posse dicere…’(*Ad Her*. 1.2.2), expl. ‘….atque imitationem amplexi fueritis’. Hic imponitur finis huic brevissime deductioni ec [=ex?] Cicerone per Philippum Casalensem de Bononia civem Pistoriensem ad instantiam clarissimi viri domini fratris Johannis de Pistorio Ordinis Praedicatorum atque predicatoris excellentissimi….’ POK V)

**Firenze**

**Riccardiana**

**3912 xi**

[De inv] comm E (Grillius)

**Forlì,**

**Bibl. Com.**

**III 90 (formerly 492) xvi (1583)**

[Ad Her] abr (Giov. Guadagni)

**Frauenfeld (Switz.)**

**Thurgauische Kantonsbibliothek**

**Y 2229 xv**

fols 238 *et seqq* [Ad Her] comm (Bartolinus; not in Wertis)

**Freiburg-i-Breisgau**

**Univbibl. [see ON(1986 (6)]**

**27 xvi (1521)**

[Ad Her] comm E (Ulrich Zasius)

[Ad Her comm E, Ulrich Zasius] s-gl

**Freiburg-i-Breisgau**

**Univbibl.**

**66 xv**

[Ad Her E] exord (Gasparino Barzizza)

**Freiburg-i-Breisgau**

**Univbibl.**

**229 xv (1471)**

De inv

[De inv] s-gl (Conrad Odernheym [-eim] de Franckfordia, student of canon law in F-in-B)

[De inv] comm. (Victorinus)

[De inv] comm. E (‘cum sint…’)

**Freiburg-i-Breisgau**

**Univbibl.**

**243 xv (1465)**

Ad Her

[Ad Her] mi/s-gl (Conrad de Franckfordia + others)

**Gdansk**

**Biblioteka Polskiej Akademii Nauk (=PAN)**

**Mar.Q.29 xv**

Ad Her extr (‘breve collectum e libro rethorice nove Marci Tulii Ciceronis’)

**Genève-Cologny**

**Bibliothèque Bodmer (1986 Jan)**

**52 (Phillips 3884) xii**

De inv

[De inv] mi/sg

[De inv] s-gl **(xv)**

Ad Her

[Ad Her] s-gl

[Ad Her] s-gl **(xv)**

[De inv / Ad Her] acc (fols76-76v ‘notes diverses sur la rhétorique’ and table of the parts of rhetoric under ‘scientia’)

**Geneva**

**Private Library of Professor Philippe Cahier (r.Pedro-Meylan, Geneva; 1986 Jan; Wertis p.299)**

**No shelf mark; designated MS ‘C’ by Wertis; xiv-xv**

Ad Her

[Ad Her] comm (Bartolinus ‘[J]ustinianus christianissimus…’)

**Genoa: see Genova**

**Genova**

**Bibl. Universitaria**

**E.III.28 xv (1448)**

[De inv] comm. (Victorinus)

[De inv] comm E (‘cum sint…’)

**Genova**

**Bibl. Universitaria**

**E.VIII.19 xii**

Ad Her

[Ad Her] mi/s-gl

De inv

[De inv] s-gl (later, xiv-xv?)

[De inv] comm E (‘si tam agentis’ frg)

**Genova**

**Bibl. Universitaria**

**G.IV.26 xiv**

Ad Her

[Ad Her] s-gl

De inv

[De inv] s-gl

**Gent**

**Rijksuniversiteit**

**10 xv (1486-87)**

De inv

[De inv] m-gl (= Victorinus)

[De inv] m-gl E (=‘cum sint…’)

Ad Her

[Ad Her] m-gl (= Guarino da Verona)

Note that fol.102r says ‘titulus talis est M.Tullii Ciceronis Rethorice nove ad differentiam veteris quam in adolescentia scripsit de qua in Oratore ait ‘qui libri a nobis ex ciderunt’ quamquam multi dicant etate iam provectum scripsisse propter eloquenciam maximam quam in illa usus est….’

**Ghent: see Gent**

**Giessen**

**Univbibl.**

**792 [B.G.XV.21 fol.] xv (1415)**

[Ad Her] comm. E (‘lectura super Tullium de memoria arttificiali secundum magistrum Grecum lecta in concilio Constantiensi’)

**Gotha**

**Forschungsbibliothek (formerly Landesbibliothek?)**

**Membr. II.50 xv**

Ad Her

**s’Gravenhage**

**Koninklijke Bibliotheek**

**183 xi**

[Alessio only; M-O ep.25-4-’86: no information, ‘la cote semble insolite’]

not included in survey ch. 4(a)

**s’Gravenhage**

**Koninklijke Bibliotheek**

**Lat. 441 xv (early; Fonds de l’Academie des Sciences / Akad.van Wet.)**

Ad Her (ff.1-85)

Illuminated initial, gold, blue, pink etc.; full page flourish, blue and red initials; f.12v has an initial featuring a dog-headed man holding a sword; initials fols 32v, 48r, 57r; complete text, no interlinear glosses and virtually no marginal.

**s’Gravenhage**

**Koninklijke Bibliotheek**

**72.J.11 xi**

Ad Her extr

[Ad Her] ex (E) (Marbod)

**s’Gravenhage**

**Museum Mermanno-Westreenianum**

**10 D 23 (xii)**

De inv

[De inv] ta (MO p.188 ‘Sommaires marginaux au f.14r-v’ [ De inv = ff.1r-29r])

Ad Her

**Graz**

**Univbibl.**

**797 xv (1462-72)**

Ad Her

[Ad Her] s-gl

**Graz**

**Univbibl.**

**1515 xii**

Ad Her extr

[Ad Her] ex (E) (Marbod)

**The Hague: see s’Gravenhage**

**Halberstad**

**Domgymnasium (? See POKk p.463)**

**69+ xii-xiii**

Ad Her extr

[Ad Her] ex (E) (Marbod)

**Hamburg**

**Staats- und Universitätsbibliothek**

**Cod Philol. 191 (Nachlass Jungius Group AC) xvi**

[Ad Her] acc (Ulrich Zasius, ‘quamvis satis ipse videam’)

[Ad Her] comm. (Ulrich Zasius ‘Rhetoricen Graeci nominant)

Hamburg Staats- und Univ. bibl

Cod Philol. 194 (4o) xvi – Alessio only.

Cod 53c in scrin xiii

not included in survey ch. 4(a)

**Harburg, Schloss (near Donauwörth, Germany), Fürstlich-Oettingen- Wallerstein’sche Bibliothek 72 *[POKk p.471 advises that the Schloss Harburg collection of MSS went to Augsburg*** *Universitäts-bibliothek* ***in 1980]***

**II 1 2o 102 xv**

De inv

Ad Her

**Harburg, Schloss (near Donauwörth, Germany), Fürstlich-Oettingen- Wallerstein’sche Bibliothek 72 *[POKk p.471 advises that the Schloss Harburg collection of MSS went to Augsburg*** *Universitäts-bibliothek* ***in 1980]***

**II 1 4o 72 xv (n.d. given in POK III p.571b, but presumably ‘xv’)**

[Ad Her] comm. E (anon. Comm. on memory section of Ad Her, inc ‘nota de causis huius tractatus causa efficiens fuit quidam maximus philosophus nomine Tulius…’ – POK III)

**Harburg, Schloss (near Donauwörth, Germany), Fürstlich-Oettingen- Wallerstein’sche Bibliothek 72 *[POKk p.471 advises that the Schloss Harburg collection of MSS went to Augsburg*** *Universitäts-bibliothek* ***in 1980]***

**II 2 8o 6 xvi (1551)**

[Ad Her] abr (Lorichius {Reinhardus Lorichius Hadamarus – POK III; Murphy *RR-Sht Title Cat* pp.22, 194)

**Heidelberg**

**Universitätsbibliothek**

**Salem 7.103 xii**

[De inv] comm. incompl (Thierry of Chartres)

**Heidelberg**

**Universitätsbibliothek**

**Salem 9.62 xiii-xiv**

De inv extr

Ad Her extr

**Heidelberg**

**Universitätsbibliothek**

**Hs.100 xi-xii**

[De inv] comm. (Manegold)

[Ad Her] comm E (Odalricus, of Rheims, later Cardinal)

**Hereford (UK)**

**Cathedral Library**

**P.1. iv xii**

De inv

De inv m-gl

De inv s-gl

[Ad Her] ta

Ad Her

**Hildesheim**

**Dombibliothek**

**625a-1 xii**

De inv E

[De inv E] mi/s-gl

**Hildesheim**

**Dombibliothek (formerly Berverin’sche Bibliothek)**

**625a-II xii**

Ad Her fols 24v-64v

[Ad Her] s-gl **xiii**

Schema : ‘partes igitur rethorice sunt V … und genera causarum rethorice…’

**Hildesheim**

**Dombibliothek ((formerly Berverin’sche Bibliothek; Gymnasium Josephinum)**

**J 70-I xii-xiii**

Ad Her

**Hildesheim**

**Dombibliothek (formerly Berverin’sche Bibliothek)**

**660-REL xii-xiii**

[De inv] comm E (Thierry of
Chartres)

**Hildesheim**

**Gymnasium Josephinum: see Dombibliothek**

**Hispanic Society of America**

**HC 327/1538 xiii** (ON 1986 [8] p.189)

Ad Her E

**Hohenfurt: see Vyssi Brod**

**Holkham Hall, Wells-Next-The-Sea, Norfolk, UK**

**Library of the Earl of Leicester (now of Viscount Coke)**

**372 xv (1419)**

Ad Her

[Ad Her] m-gl (from Bartolinus,’ Felix qui’?)

**Holkham Hall, Wells-Next-The-Sea, Norfolk, UK**

**Library of the Earl of Leicester (now of Viscount Coke)**

**373 xiv**

Ad Her

[Ad Her] s-gl

[De inv / Ad Her] comm (‘Summula distinctionum rhetorice ex arte veteri et nova, collecta per Luysius [sic] de Gianfilliaziis de Florentia’; autograph? Cf. a fuller version in MS Vat. I.VIII.291 ‘’summa dictaminum retorice ex arte veteri et nova collecta’, ON 1975 [3] pp.315, 337)

[De inv / Ad Her comm.] s-gl

**Holkham Hall, Wells-Next-The-Sea, Norfolk, UK**

**Library of the Earl of Leicester (now of Viscount Coke)**

**374 xv (1474)**

Ad Her

[Ad Her] mi/s-gl (cf. MS Bologna Bibl. Univ. 2461; Flor BML Plut. 50.26)

[Ad Her E] exord (Gasparino Barzizza)

**Holkham Hall, Wells-Next-The-Sea, Norfolk, UK**

**Library of the Earl of Leicester (now of Viscount Coke)**

**375 xv (1452)**

De inv

[De inv] s-gl

**Iowa City (USA)**

**University of Iowa Library**

**2 xiv**

Ad Her E

**Ithaca (USA)**

**Cornell University Library**

**MSS Bd Rare P.R.47 (formerly B 28) xv**

Ad Her

[Ad Her] mi/s-gl (many hands; formerly Phillipps MS 16,298)

**Kalocsa (= Colocsa, Hungary)**

**Föszékesegyházi Könyvtár (Cathedral Library)**

**360 xv (1468)**

[Ad Her E) exord (Gasparino Barzizza)

**Karlsruhe**

**Badische Landesbibliothek**

**Ettenheim Münster 27 xv**

Ad Her

De inv E (‘incipiunt quedam regule de conquestione’ = S73b.15-75b.19 etc)

**Karlsruhe**

**Badische Landesbibliothek**

**Fr 109 ix**

Ad Her E (= ‘fragmenta Augiensia’ reclaimed from book bindings etc)

**Kassel**

**Landesbibliothek und Murhardsche Bbliothek der Stadt Kassel (= Gesamthochschulbibliothek)**

**4o Mss.philol.3 – I+ xi**

De inv

[De inv] mi-gl

[De inv] ta

[De inv] comm. E (‘cum sint…’)

**Klausenburg: see ‘Cluj’**

**Klosterneuberg**

**Stiftsbibliothek**

**735 xv**

De inv

[De inv] m-gl (= Victorinus)

[De inv] m-gl E (= cum sint…’)

**København**

**Kongelige Biblioteket**

**Gl. Kgl. S.428 fo xv (1437)**

Ad Her

**København**

**Kongelige Biblioteket**

**Gl. Kgl. S.1996 4o xv (1437)**

Ad Her

**København**

**Kongelige Biblioteket**

**Gl. Kgl. S.1997 4o xv**

Ad Her

**København**

**Kongelige Biblioteket**

**Gl. Kgl. S.1998 4o xv**

De inv

Ad Her

**København**

**Kongelige Biblioteket**

**Gl. Kgl. S.1999 4o xii**

De inv

[De inv] comm E (‘si tam agentis’ frg)

Ad Her

**København**

**Kongelige Biblioteket**

**Gl. Kgl. S.2000 4o xii**

De inv

Ad Her

**København**

**Kongelige Biblioteket**

**Gl. Kgl. S.2001 4o xiii**

De inv

**København**

**Kongelige Biblioteket**

**Ny kgl. S.119 8o xii**

De inv E

**København**

**Kongelige Biblioteket**

**Ny kgl. S.214b 4o xii**

De inv

Ad Her

[Ad Her] cn

**København**

**Kongelige Biblioteket**

**Ny kgl. S.214b 4o xii**

[Ad Her] cn = repeat of item above?

**København**

**Kongelige Biblioteket**

**Thott 396 fo xv**

Ad Her

**København**

**Kongelige Biblioteket**

**Thott 1049 4o xv**

Ad Her

**København**

**Kongelige Biblioteket**

**Donat. Var. 18 fol. I xv (1494-95)**

Ad Her E

[Ad Her E] s-gl

**Köln**

**Erzbischolfliche Diözesan- und Dombibliothek (formerly Dombibliothek)**

**166 (formerly Darmstadt 2191) viii**

[De inv] comm (Victorinus)

[De inv] comm E (‘cum sint…’ = MO I #468 p.131)

**Köln**

**Erzbischolfliche Diözesan- und Dombibliothek (formerly Dombibliothek)**

**197-I (formerly Darmstadt 2170) xii**

[De inv] comm E (Manegold)

**Köln**

**Erzbischolfliche Diözesan- und Dombibliothek (formerly Dombibliothek)**

**198 (formerly Darmstadt 2171) x-xi**

[De inv] comm E (Grillius)

**Köln**

**Historisches Archiv der Stadt Köln**

**GB f.43 xiv**

## Ad Her

(IRHT); does MS also contain *De inv*? Fols given for *Ad Her* are odd: 70v-71, 179-226 and 72-101

# Kórnik

**Biblioteca Kórnicka Polskiej Akademii Nauk**

**633 xv**

[De inv] trans/para-ital* (POK IV)

# Krakow

## **Biblioteca Jagiellónska (Universytet Jagiellonski Biblioteka)**

**433 (CC VIII 6) xv (1469-72)**

Ad Her E

[Ad Her E] m/mi-gl

# Krakow

## **Biblioteca Jagiellónska (Universytet Jagiellonski Biblioteka)**

# 496 (DD VIII 18) xv (1467)

# [Ad Her] comm (Bartolinus)

# [Ad Her comm Bartolinus] s-gl (Andrea Grzymala)

# Krakow

## **Biblioteca Jagiellónska (Universytet Jagiellonski Biblioteka)**

**516 xv (1459)**

Ad Her

# [Ad Her] mi/s-gl

# Krakow

## **Biblioteca Jagiellónska (Universytet Jagiellonski Biblioteka)**

# 518 (DD VIII 11) xv (1451)

De inv

[De inv] s-gl

## Ad Her

# Krakow

## **Biblioteca Jagiellónska (Universytet Jagiellonski Biblioteka)**

# 520 (DD VIII 14) xvi

Ad Her incompl

[Ad Her incompl] mi-gl (**xv-xvi**, by, in part, ‘Erasmus Ciotek Iunior’, master of arts from Cracow University, Cistercian, abbot and suffragan bishop of Cracow; d.1546)

# Krakow

## **Biblioteca Jagiellónska (Universytet Jagiellonski Biblioteka)**

# 679 (DD V 14) xiv-xv

[De inv / Ad Her [etc.)] para

# Krakow

## **Biblioteca Jagiellónska (Universytet Jagiellonski Biblioteka)**

**680 (DD V 8) xiv**

[De inv / Ad Her [etc.)] para

# Krakow

## **Biblioteca Jagiellónska (Universytet Jagiellonski Biblioteka)**

# 1871 (CC IX 22) xvii

# De inv / Ad Her extr

# Krakow

## **Biblioteca Jagiellónska (Universytet Jagiellonski Biblioteka)**

**1949 (BB XXVI 18) xv**

# De inv

# Krakow

## **Biblioteca Jagiellónska (Universytet Jagiellonski Biblioteka)**

# 2390 (DD XVIII 17) xvii

[Ad Her] acc (M.Stanislaw Pudlovy)

# Krakow

## **Biblioteca Jagiellónska (Universytet Jagiellonski Biblioteka)**

# 2467 (DD X 17) xvi

[Ad Her] acc (anon)

# Krakow

**Biblioteca Muzeum Narodowego w Krakowie, Oddzial Zbiory Czartoryskich**

**911 xviii**

[De inv / Ad Her etc] para (‘praecepta de arte rhetorica ex Cicerone excerpta’, in a vol. with ‘exercitia Stanislai Augusti Poniatowski iuvenis’)

**Krakow Archivum Kapituly Metropolitane 244** (Alessio only)

Not included in survey ch. (4)a

**Kremsmünster**

# Stiftsbibliothek

**147 xv**

[Ad Her] comm (Bartolinus ‘Justinianus Christianissimus…’)

**Kremsmünster**

# Stiftsbibliothek

**269 xiv**

## Ad Her E (*colores* from Bk IV…)

**Kues**

**St.Nikolaus-Hospital**

**52-xiii [probably the same as ‘C 14’ = Kraus no.’] xii**

De inv extr

[De inv extr ] s-gl (**xii-xiii)**

Ad Her extr

[Ad Her extr] s-gl (**xii-xiii)**

**Lamballe**

**Bibliothèque Municipale**

**3 xii**

## De inv incompl

[De inv incompl] s-gl (**xii-xiii)**

## Ad Her incompl

[Ad Her incompl] s-gl (**xii-xiii)**

**Laon**

**Bibliothèque Municipale**

**453 xv**

## Ad Her fols 1r-155r

## [Ad Her] sgl

## red / blue initials; beginning initials illuminated; a few sparse glosses at the beginning, then nothing; adjust for survey ch. 4(a)

**Laon**

**Bibliothèque Municipale**

**453 bis xii**

De inv

[De inv] s-gl

Ad Her

[Ad Her] s-gl

**Lawrence, Kansas City (USA)**

### University of Kansas, Kenneth Spencer Research Library

**6 xiv**

Ad Her

**Leiden**

### Bibliotheek der Rijksuniversiteit

**B.P.L. 50 xv (1459)**

Ad Her

**Leiden**

### Bibliotheek der Rijksuniversiteit

**B.P.L. 67C xv**

[De inv] comm (Victorinus)

[De inv] comm E (anon *cum*)

[De inv] ta-rhet

**Leiden**

### Bibliotheek der Rijksuniversiteit

**B.P.L. 189 xii**

[De inv] comm E (Thierry of Chartres)

De inv E

**Leiden**

### Bibliotheek der Rijksuniversiteit

**B.P.L. 195 xii**

## Ad Her

[Ad Her] s-gl

De inv

[De inv] s-gl

**Leiden**

### Bibliotheek der Rijksuniversiteit

### Gronov. 6 xiv and xv

Ad Her (1-26r)

De inv (ff. 26v-55v, *Iter IV p.361b*

Michaelis de Santa Cruce, *Expositio Rhetoricorum ad Herennium*, fols 56-103v; eiusdem expositio diversa ab altera, italica lingua conscripta aliaque manu fols 104-115; Cicero *Topica* fols 116-124). Fols 1-26r: space for an initial and smaller initial spaces throughout but done fols 1-14. Medium glossing – at least several per page, often paragraphs; f.14 = bk IV, heavy glossing filling all margins; small neat xiv hand. Copious interlinear glossing in bk2, sparse in bk1; glossing is in a later hand, probably xv. Fols 27-55, *De inventione* in much same pattern and hand as *Ad Her*., but heavy interlinear glossing only on first 2 folios, less on later folios. Virtually no marginal glosses after f.28. Fol.55v: ‘explicit liber Retthoricorum Masrci Tullii Ciceronis, vetus, in quo de inventione, prima parte rethorice, tractatur… Fol 56, seemingly in same hand as the scholia on the previous books, inc. ‘Sicut scribitur primo Officiorum…..’. Fols 104-115 ‘Quia ut ait vetus…’; f.115r ‘explicit Praticha super Tulio Rettoricorum vulgaris composita a magistro Michaele de Sancta Cruce, artis eiusdem fontibus emanante, Deo gracias, Amen’. The collection was probably put together by the xv hand of the paper commentary fols 56-103v. Information from inspection by Lola Sharon Davidson; correct and adjust survey in ch. 4(a).

**Leiden**

### Bibliotheek der Rijksuniversiteit

### Gronov. 22 xii

De inv (ff.1-50v)

Ad Her (ff.59-112v)

*De inv*. fols 1-50v long lines, interlinear and marginal glossing in sepia and black, later hands, possibly xiv; diagrams f.21v, pointing hand 24r, glossing tails of in bk2, generally medium glossing but on all pages. Fols 50v-58v ‘epistola Alexandri Regis ad Aristotilem de regionibus Indiae’, in same hand, without glossing. *Ad Her.* fols 59r-112v, possibly by a different scribe; heavy glossing in both later hands throughout. Information from inspection by Lola Sharon Davidson; correct and adjust survey in ch. 4(a).

**Leiden**

### Bibliotheek der Rijksuniversiteit

**Lips. 44 xii**

De inv (ff.3-43v)

Ad Her (ff.43v-80)

*De inv.* fols 3-41v, long lines, black, small and neat hand; beautiful initial in gold, red, green and grey against blue background; a winged dragon bent backwards with the lower part of the ‘S’ filled with interlacing, including a man’s head; f.4 smaller initial, gold, green, red against blue; initials red, blue, green alternately; f.21v large picture initial, interlacing, gold etc.; f.43v illuminated ‘E’; no glosses of any kind. Information from inspection by Lola Sharon Davidson.

**Leiden**

### Bibliotheek der Rijksuniversiteit

**Lips. 45 xii** *(RTB 1995 p.169: see)*

De inv (ff.1-37)

[De inv] s-gl

Ad Her (ff.38r-72r)

[Ad Her] s-gl

*De inv.* beginning missing; small long lines; space for initial f.15v; no glossing; four folios have a tiny amount of marginal glossing. *Ad Her.* much the same hand: heavy interlinear and marginal glossing, stopping at top of f.55v. tiny space for initial f.38v; some red colouring of black initialling. Information from inspection by Lola Sharon Davidson.

**Leiden**

### Bibliotheek der Rijksuniversiteit

**Voss.Lat. F 70 (tom.I-I (alpha) x**

[De inv] comm (E) (Grillius)

De inv fols 51rb-66va

[De inv] s-gl

check; in 1870 the original MS was divided into three parts, I, II, III. I contains two codices, A and B, bound together in the 19th century between paper leaves. A contains Cicero, Aristotle, Boethius, Ps-Augustine, Macrobius and the *De inv*.; B contains glosses, Alcuin, Seneca; II contains glosses, theology, a catalogue; III contains Hugh of St. Victor. The *De inv* is water damaged and in tiny writing; it is so badly damaged that it is illegible in parts; no glossing and no decoration other than a circle diagram filling the top and bottom margins of f.51rb

**Leiden**

### Bibliotheek der Rijksuniversiteit

**Voss.Lat. O 64 xii**

De inv fols 1r-39r

Ad Her fols 40r-69v

No glossing. Central France? F.1r has a dragon initial in blue, red and green; title in red; f.2v a wild man initial in b.lue and green; f.20 initial – bird; f.39r half page blank; f.39v blank; f.40r a man entwined with serpent and fish at bottom of page; f.43v a naked man; f.50r a fierce seated man; f.55v a dragon; 69v ends with explicit at the bottom of the page

**Leiden**

### Bibliotheek der Rijksuniversiteit

**Voss.Lat. O 66 xv**

Ad Her fols 1-69v

[Ad Her] s-gl

Italy; lots of red and blue decorative initials and yellow marking of initials; moderate glossing throughout but never continuous around text. Some interlinear glossing.

**Leiden**

### Bibliotheek der Rijksuniversiteit

**Voss.Lat. Q 33-I x-xi**

De inv fols 2-56r

[De inv] m-gl (xi-xii)

f.1v illustration of marriage of Philology and Mercury; representation of Rhetoric - a female figure with helmet, shield and spear exhorting two male scholars reproduced in B&W in the Voss Lat. Catalogue, but get?); moderate to heavy glossing, some interlinear, but mostly marginal. On f.56r after the explicit the remaining half of the page is filled with a diagram, showing *scientia*, wisdom and eloquence etc. Saint Gall

**Leiden**

### Bibliotheek der Rijksuniversiteit

**Voss.Lat. Q 103 xii (2nd half)**

De inv fols 1-46r

[De inv] s-gl

Ad Her fols 52v-102r

[Ad Her] s-gl

from southern France? F.1r gold ‘S’, incipit in alternating red and blue; f.46r gold ‘S’; f.52v gold ‘E’; f.70v gold ‘A’; f.79v gold ‘Q’; small green marking of initials, small decorative initials in blue, green, red but not frequent

**Leiden**

### Bibliotheek der Rijksuniversiteit

**Voss.misc. 21 xv-xvii**

De inv frg (fols 146-163v)

[De inv] cn (fols 146-63 contains variants in a modern hand ‘de MSS Nobiliss. B.Schobingeri IC collatae ad editionem Gothofredi (Genevae) 1594’)

an extremely miscellaneous notebook; Greek and Latin grammar, vocabulary, poems, epigrams etc.

**Leiden**

### Bibliotheek der Rijksuniversiteit

**Vulc.48 xiv**

Ad Her extr

[Ad Her] ex (Marbod)

**Leipzig**

**Universitätsbibliothek (includes MSS formerly in Stadtbibliothek and ‘Bibliotheca Senatoria’)**

**Rep. I 96 [=XCII (Rep.I.8.96)] xv (1438)**

Ad Her

[Ad Her] s-gl

**Leipzig**

**Universitätsbibliothek**

**Rep. IV 98c [=CIV (Rep.IV.4.98c)] xvi (c.1529)**

[Ad Her] comm E (Ulrich Zasius)

**Leipzig**

**Universitätsbibliothek**

**MS 1246** fols 205r-259r ‘MNB’ ???

Anon. ‘ars oratoria Aristotilis et Tulii per figures et exempla illustrata: ‘orator recipere debet tria genera causarum…’ date?

Not included in survey ch. 4(a); check all nos: do I have them right?

**Leipzig**

**Universitätsbibliothek**

**1249 xv**

[Ad Her] para (‘incipit resolutio rethorice Tulii ad herennium scripte ut sequitur: rethorica dicta a resis quod est ornatus et ycos scientia…’; described in Cat. as ‘Rhetorica Heinrici Hardekesk ,,,’)

[Ad Her E] exord (Barzizza)

**Leningrad: see Saint Petersburg**

**Leuven**

**Universiteitsbibliothek**

**157 xii+**

De inv

[De inv] s-gl

Ad Her

[Ad Her] s-gl

Ad Her extr

[Ad Her] ex (Marbod)

**Leuven**

**Universiteitsbibliothek**

**159 xiii-xiv+**

De inv

[De inv] s-gl

[De inv] comm E (‘si tam agentis’ frg)

Ad Her

[Ad Her] s-gl

De inv E

**Liège**

**Bibliothèque de l’ Université (Bibliothèque Universitaire)**

**63 xv-xvi**

Ad Her

IRHT- only *Ad Her*? Date? Glosses?

**Linköping (Sweden)**

**Stifts- och Landesbiblioteket (IRHT calls ‘Bibl. Capitulaire et Provinciale’??)**

**KF 30 xiv**

De inv

[De inv] s-gl

Ad Her

[Ad Her] s-gl

**London**

**British Library (formerly British Museum Library)**

**Add. 10,086 xv (1445)**

Ad Her

[Ad Her] s-gl (Guarino da Verona school?)

**London**

**British Library**

**Add. 11,391 xv**

[Ad Her] comm E (anon ‘solet queri in principio operis quis auctor fuit’)

**London**

**British Library**

**Add. 11,916 xi (and xiv)**

De inv

[De inv] s-gl (**and xiv-xv**)

Ad Her

[Ad Her] s-gl (**xii? and xiv-xv**)

[Ad Her] ta

**London**

**British Library**

**Add. 11,917 xiv**

De inv

[De Inv] mi/s-gl

Ad Her

[Ad Her] s-gl

get copies of miniatures

**London**

**British Library**

**Add. 11,918 xv**

De inv

[De Inv] s-gl

Ad Her

[Ad Her] s-gl

**London**

**British Library**

**Add. 11,919 xv**

Ad Her

[Ad Her] s-gl

**London**

**British Library**

**Add. 11,920 xv**

Ad Her

[Ad Her] s-gl

**London**

**British Library**

**Add. 11,921 xv**

Ad Her

[Ad Her] mi/s-gl

get photo of miniature of Cicero f.2r

**London**

**British Library**

**Add. 11,938 xv**

Ad Her

[Ad Her] s-gl

**London**

**British Library**

**Add. 11,983 xi**

Ad Her extr

[Ad Her] ex (Marbod)

**London**

**British Library**

**Add. 12,119 xv**

Ad Her

[Ad Her] s-gl????? My nn indicate ‘no’

**London**

**British Library**

**Add. 15,302 xv**

De inv

Ad Her

[Ad Her] mi-gl (several hh)

**London**

**British Library**

**Add. 16,421 xii**

Ad Her

[Ad Her] s-gl

**London**

**British Library**

**Add. 16,437 xv**

[Ad Her] trans/para-ital* (Guidotto / Giamboni)

**London**

**British Library**

**Add. 16,984 xii**

De inv

[De inv] s-gl

Ad Her

[Ad Her] s-gl

**London**

**British Library**

**Add. 17,414 xv**

Ad Her E

**London**

**British Library**

**Add. 18,843 xiv**

Ad Her

De inv

**London**

**British Library**

**Add. 19,935 xv**

[De inv] comm (Victorinus)

[De inv] comm E (‘cum sint…’ = MO I #468 p.131)

**London**

**British Library**

**Add. 22,862 xv**

[Ad Her] para-v

[Ad Her para-v] s-gl (‘compendium rethorice Tullii’; hexameter verse)

**London**

**British Library**

**Add. 23,892 xiii**

Ad Her extr

[Ad Her] ex (Marbod)

**London**

**British Library**

**Add. 24,199 xii**

Ad Her extr

[Ad Her] ex (Marbod)

**London**

**British Library**

**Add. 41,490 xiv**

Ad Her E (23 lines extracted from Ad Her IV on the *colores* as a preface to Bernard Silvestris *Cosmographia*)

**London**

**British Library**

**Arundel 271 xv**

Ad Her

[Ad Her] s-gl (several hh)

**London**

**British Library**

**Arundel 348-I, II and III xii**

De inv

Ad Her

[De inv] comm E (Thierry of Chartres)

**London**

**British Library**

**Burney 137 xv (1473)**

[Ad Her] cn

**London**

**British Library**

**Burney 161 xiii**

De inv

[De inv] s-gl

Ad Her

[Ad Her] mi/s-gl (contemp & other hh)

**London**

**British Library**

**Burney 162 xv**

[De inv] comm E (‘si tam agentis’ frg)

De inv

Ad Her

[Ad Her] s-gl

**London**

**British Library**

**Burney 163 xv**

Ad Her

**London**

**British Library**

**Burney 164 xv**

Ad Her

[Ad Her] s-gl

[De inv] comm E (‘si tam agentis’ frg)

**London**

**British Library**

**Burney 275 xiv**

De inv

Ad Her

get copy of ff.120ra143rb

**London**

**British Library**

**Harley 2492 xv (1469)**

De inv

[De inv] s-gl

Ad Her

[Ad Her] s-gl

[Ad Her E] exord (Barzizza)

**London**

**British Library**

**Harley 2510-I xii**

De inv

Ad Her

[Ad Her] s-gl

**London**

**British Library**

**Harley 2548 xv (1470)**

Ad Her

[Ad Her] s-gl

**London**

**British Library**

**Harley 2580 xv**

[Ad Her] inaug (Guarino da Verona)

**London**

**British Library**

**Harley 2589 xv (1468)**

Ad Her

[Ad Her] s-gl

**London**

**British Library**

**Harley 2590 xv**

Ad Her

[Ad Her] s-gl

**London**

**British Library**

**Harley 2600 xiv**

Ad Her

[Ad Her] mi/s-gl

get copy of f.1ra

**London**

**British Library**

**Harley 2618 xv**

De inv

[De inv] s-gl

Ad Her

[Ad Her] s-gl

**London**

**British Library**

**Harley 2619 xiv**

Ad Her

[Ad Her] s-gl

**London**

**British Library**

**Harley 2623 xii**

De inv

[De inv] s-gl (**xiii-xiv**)

Ad Her

[Ad Her] s-gl (several hh)

[De inv / Ad Her] ta-rhet

**London**

**British Library**

**Harley 2624 xii**

De inv

[De inv] s-gl

Ad Her

[Ad Her] s-gl

Martin Camargo writes: ‘Other monks of St. Albans engaged in similar activity after returning fromtheir studies at Oxford. Hugh Legat, prior of Redbourne, is an especially outstanding example: he glossed a twelfth-century copy of the *De inventione* (which he had bound together with a twelfth-century copy of the *Rhetorica ad Herenniumn*), wrote commentaries on Boethius’ *Consolation of Philosophy* and Jean of Hauville’s *Architrenius*, and collected a number of early texts on grammar and rhetoric for the use of the monks at St.Albans…..’ (Camargo [2009] p.380; Leghat ‘flourished’ c.1400 A.D.). Update and correct rthe survey in ch. 4(a).

**London**

**British Library**

**Harley 2629 xv**

Ad Her

[Ad Her] s-gl

**London**

**British Library**

**Harley 2679 xv**

[De inv] comm (Victorinus)

[De inv] comm E (‘cum sint…’ = MO I #468 p.131)

**London**

**British Library**

**Harley 2696 xv**

Ad Her

[Ad Her] s-gl

**London**

**British Library**

**Harley 2739 xiv-xv**

Ad Her

[Ad Her] m-gl

**London**

**British Library**

**Harley 2748 xv**

Ad Her

[Ad Her] s-gl

get copy of f.3r

**London**

**British Library**

**Harley 3509 xii**

De inv

[De inv] s-gl

Ad Her

[Ad Her] s-gl

**London**

**British Library**

**Harley 3871 xv**

Ad Her

[Ad Her] s-gl (several hh)

[Ad Her E] exord (Barzizza)

**London**

**British Library**

**Harley 3925 xv (1431)**

De inv

Ad Her

**London**

**British Library**

**Harley 3932 xv**

Ad Her

**London**

**British Library**

**Harley 3949 xv (1430)**

Ad Her

[Ad Her] s-gl

**London**

**British Library**

**Harley 3969 xiii**

Ad Her extr

[Ad Her] ex (Marbod)

not in Leotta; my nn are equivocal: I say I saw it 26/5/87 and noted Marbod f.204r, yet my FC (2) nn say ‘nothing relevant’?

**London**

**British Library**

**Harley 4806 xiv**

De inv

[De inv] s-gl

Ad Her

[Ad Her] mi-gl (several hh)

**London**

**British Library**

**Harley 4810 xv**

Ad Her

[Ad Her] s-gl

**London**

**British Library**

**Harley 5060 xv (1426)**

[De inv] comm (Thierry of Chartres)

**London**

**British Library**

**Harley 5432 xv**

Ad Her

**London**

**British Library**

**Harley 6324 xiv**

[Ad Her] comm (Alanus)

**London**

**British Library**

**Harley 6329 xv**

[De inv] comm (Victorinus)

**London**

**British Library**

**Harley 6349 xiii ???? verse?**

Ad Her

[Ad Her] s-gl (‘this fine MS has a comprehensive system of internal rubricking which amounts to a kind of gloss’ – JOW on site)

Ad Her extr

[Ad Her] ex (Marbod)

does the Marbod have *both* *Ad Her* and exx?

**London**

**British Library**

**Lansdowne 831 xv**

De inv

get copy of central portion of f.76r and all of f.1r

**London**

**British Library**

**Reg. [Royal] 8 A.XXI xiii**

Ad Her extr

[Ad Her] ex (Marbod)

**London**

**British Library**

**Reg. [Royal] 15 A.XX-II xii**

De inv

**London**

**British Library**

**Reg. [Royal] 15 A.XXVI xiii**

De inv

**London**

**British Library**

**Reg. [Royal] 15 C.XI xiii**

De inv

Ad Her

**London**

**British Library**

**(Inc) IB 20134 and IB 25091** xv (1475)

[printed copy of De inv and Ad Her) s-gl (with MS marginalia)

**London**

**???**

**Phillipps 914 xii (IRHT; Kraus Cat. 153 p.15 no.8; M-O letter, CMN p.27: ‘se trouve actuellement dans une collection privée, apparemment à Londres: MO C. 345.5 (Addenda)’ [which seems to refer to nothing like this MS???])**

De inv

Ad Her

**London**

**Sotheby, Parke, Bernet and Co (Auctioneers)**

**Lot 30, Sale 27/3/1950 xiv (1342)** (The whereabouts of this MS are not known, but a a part photostat copy (to Ad Her 4.49.62, Marx ed. min. 180.13) to fol.52 exists in the Harry Caplan papers at Cornell University, Ithaca, N.Y. and is currently on loan to myself through the kindness of Professor Johns of that University)

[Ad Her] comm (‘plena et perfecta locutio triplici comparatur…’ / ‘(*etsi in negotiis*) more aliorum autorum premictit autor operi suo prohemium…’).

**Louvain: see Leuven**

**Lucca**

**Biblioteca Capitolare Feliniana**

**522 xv (1470)**

De inv

glossed?

**Lucca**

**Biblioteca Capitolare Feliniana**

**614 xii**

[De inv / Ad Her] para (see Alessio and Fredborg on, in Calboli-Montefusco ed. *Papers on Rhetoric* V)

is the date correct?

**Lucca**

**Biblioteca Statale (formerly Biblioteca Governativa)**

**1405 xii (**f.1r, half-page miniature of Cicero and Sallust sitting on thrones….; cf. MS Oxford Barlow 40)

Ad Her

[Ad Her] s-gl (several later hh)

get copy of f.1r, half-page miniature of Cicero and Sallust sitting on thrones….

**Lucca**

**Biblioteca Statale (formerly Biblioteca Governativa)**

**1965 xiv**

Ad Her

[Ad Her] mi-gl (several hh)

**Lüneburg**

**Ratsbücherei**

**Theol.2o 87 III xv (1441)**

Ad Her

[Ad Her] mi/s-gl

**Lyon[s]**

**Bibliothèque de la Ville (Municipale)**

**128 (60) xv**

Ad Her

[Ad Her] ex (Marbod)

check; f.182 *colores* in metre ‘insuper hoc metro quod tibi tradere curo …. nimirum Paridis mors es(t?) eversio Troye’ – 185? Coloured initials

**Madrid**

**Biblioteca de Palacio**

**II 11258 (2.J.3) xv**

De inv E

Not included in survey ch. 4(a); according to POKk p.574 a large group of MSS was transferred to the Biblioteca Salamanca. Check whereabouts of MSS. Partial concordance in Fink-Herrera *Scriptorium* 13 (1959) pp.112-18; see below under ‘Salamanca’.

**Madrid**

**Biblioteca Nacional**

**552 xvi**

Ad Her E

All Madrid Bibl. Nac refs should be checked.

**Madrid**

**Biblioteca Nacional**

**8185 (V-194) xv**

Ad Her

[Ad Her] mi/s-gl xvi

**Madrid**

**Biblioteca Nacional**

**9004 (Aa 34) xiv-xv**

De inv

Ad Her

**Madrid**

**Biblioteca Nacional**

**9309 xiv**

Ad Her

[Ad Her] s-gl

[Ad Her] acc

**Madrid**

**Biblioteca Nacional**

**10070 xii**

De inv

[De inv] s-gl

Ad Her

[Ad Her] s-gl (IRHT dates to xiii; M-O III.2 p.33 to xii ‘ex’; MO says ‘pas de gloses’, IRHT says ‘quelques rares notes marginales contemporaines’??)

**Madrid**

**Biblioteca Nacional**

**12, 636 xii**

De inv

[De inv] s-gl (**xii-xiv**)

Ad Her

[Ad Her] s-gl (**xii-xiv**)

**Manchester**

**University Library (= John Rylands University Library)**

**47 h 10 xiv** ; POK *Iter* 4; Christie Collection)

[Ad Her] comm (Alanus)

see

**Mantua**

**Biblioteca Comunale**

**B IV 9 xv**

[Ad Her E] exord (Gasparino Barzizza; ? POK *Iter* 1 p.273)

check

**Melk (Austria)**

**Stiftsbibliothek**

**725 xii**

De inv

Ad Her

[Ad Her] s-gl (later hh, xiii)

check

**Melk (Austria)**

**Stiftsbibliothek**

**1225 [656 (L 86)] xv**

De inv / Ad Her extr (?? Bursill-Hall p.132; POK Iter III p.31; VI)

check

**Metz (France)**

**Bibliothèque Municipale**

**387 xii+**

De inv

**Metz (France)**

**Bibliothèque Municipale**

**642 xv**

[De inv] comm. (Victorinus)

[De inv] comm. E (‘cum sint…’)

**Michelstadt**

**Evangelische Kirchenbibliothek**

**C 392 xvi (1540)**

[Ad Her] comm (anon ‘In rhetoricam Ciceronis ad Herennium annotationes, Aureliae anno 1540; POK Iter III)

**Milano (Milan)**

**Archivio Storico Civico e Biblioteca Trivulziana: see Biblioteca Trivulziana**

**Milano (Milan)**

**Biblioteca Ambrosiana**

**A 36 inf xv (1445)**

[Ad Her] comm (Guarino da Verona)

**Milano (Milan)**

**Biblioteca Ambrosiana**

**C 14 sup xv**

Ad Her

[Ad Her] mi-gl

**Milano (Milan)**

**Biblioteca Ambrosiana**

**D 37 inf xiv**

[Ad Her] comm (Bartolinus; ‘felix qui…’)

**Milano (Milan)**

**Biblioteca Ambrosiana**

**E 7 sup xii (1121 or 1154?)**

Ad Her

[Ad Her] s-gl (= Alanus?)

**Milano (Milan)**

**Biblioteca Ambrosiana**

**E 14 inf xiv**

De inv

Ad Her

**Milano (Milan)**

**Biblioteca Ambrosiana**

**E 57 sup xv**

Tractatus de memoria artificiali, = *Ad Her.* or close to??

Not included; check and if so add to survey in ch.4 (a).

**Milano (Milan)**

**Biblioteca Ambrosiana**

**E 59 sup xii**

Anon. ‘definitiones rhetoricae’ fols 1v-2r

De inv

[De inv] s-gl

Ad Her

[Ad Her] s-gl

[Ad Her] ex (Marbod)

date: xii-xiii?

**Milano (Milan)**

**Biblioteca Ambrosiana**

**E 69 inf xii**

De inv

[De inv] s-gl

Ad Her

[Ad Her] s-gl

[Ad Her] ex (Marbod)

**Milano (Milan)**

**Biblioteca Ambrosiana**

**F 75 sup xii-xiii**

De inv

Ad Her

**Milano (Milan)**

**Biblioteca Ambrosiana**

**G 57 inf xvi**

[De inv] trans/para-ital* (POK VI)

check

**Milano (Milan)**

**Biblioteca Ambrosiana**

**H 47 sup xiv-xv**

De inv

Ad Her incompl

**Milano (Milan)**

**Biblioteca Ambrosiana**

**H 79 sup xv**

Ad Her

**Milano (Milan)**

**Biblioteca Ambrosiana**

**H 123 inf xv**

Ad Her

[Ad Her] mi-gl

**Milano (Milan)**

**Biblioteca Ambrosiana**

**I 29 sup xii**

[De inv / Ad Her] para (see Alessio and Fredborg on, in Calboli-Montefusco ed. *Papers on Rhetoric* V)

**Milano (Milan)**

**Biblioteca Ambrosiana**

**I 87 sup xv (1437)**

[Ad Her] comm (Bartolinus; ‘Justinianus…’)

**Milano (Milan)**

**Biblioteca Ambrosiana**

**I 91 sup xv (1475)**

[De inv] comm. (Victorinus)

[De inv] comm. E (‘cum sint…’)

**Milano (Milan)**

**Biblioteca Ambrosiana**

**I 142 inf xiv-xv**

[Ad Her] cn

De inv E

[De inv E] comm

[De inv E] mi-gl

Ad Her

[Ad Her] comm

[Ad Her] m-gl

**Milano (Milan)**

**Biblioteca Ambrosiana**

**L 83 sup xv**

Ad Her

[Ad Her] m-gl (Martinus Rhetorinus = Alanus?)

**Milano (Milan)**

**Biblioteca Ambrosiana**

**L 91 sup xv (1431)**

Ad Her

[Ad Her] s-gl

**Milano (Milan)**

**Biblioteca Ambrosiana**

**L 104 sup xv**

Ad Her

**Milano (Milan)**

**Biblioteca Ambrosiana**

**M 58 sup xi**

De inv E

[De inv E] mi/s-gl (**xii**)

Ad Her incompl

[Ad Her incompl] mi-gl (**xii, xiv-xv**)

**Milano (Milan)**

**Biblioteca Ambrosiana**

**N 178 sup xiii**

De inv E

[De inv E] s-gl (**xiv-xv**)

Ad Her

[Ad Her] mi/s-gl (xv?)

[De inv / Ad Her] acc

**Milano (Milan)**

**Biblioteca Ambrosiana**

**N 181 sup xii**

De inv

[De inv] s-gl

Ad Her

[Ad Her] s-gl (**xii-xv**)

De inv extr

check

**Milano (Milan)**

**Biblioteca Ambrosiana**

**O 33 sup xii** (dates vary: xi-xii and xiii [IRHT] are also suggested)

De inv

Ad Her

**Milano (Milan)**

**Biblioteca Ambrosiana**

**O 37 sup xii**

De inv

[De inv] mi-gl

Ad Her

[Ad Her] mi-gl

[Ad Her] s-gl (**xiii-xiv**)

[De inv / Ad Her] ta-rhet

[De inv] comm E (‘si tam agentis’ frg)

**Milano (Milan)**

**Biblioteca Ambrosiana**

**P 93 sup xv**

De inv

**Milano (Milan)**

**Biblioteca Ambrosiana**

**Q 55 sup xv**

Ad Her

**Milano (Milan)**

**Biblioteca Ambrosiana**

**R 17 sup xii**

De inv

[De inv] s-gl

Ad Her

Does *Ad Her* have glosses too? My paper nn say ‘yes;, but such nn are not included in survey ch.4(a)

**Milano (Milan)**

**Biblioteca Ambrosiana**

**S 34 sup xv**

Ad Her

**Milano (Milan)**

**Biblioteca Ambrosiana**

**T 38 sup xv (1441)**

De inv

[De inv] mi-gl

**Milano (Milan)**

**Biblioteca Ambrosiana**

**T 78 sup xv (1466)**

Ad Her E

**Milano (Milan)**

**Biblioteca Ambrosiana**

**91 sup 23**

Obscure; check. EE Ad Her? fols 130-133??, Gasparino fols 154-56v; frg? Ends ‘videtur ergo iudices, quales vos in huiusmodi hominem et tamquam belluam oportet esse’???? Not included in survey ch. 4(a)

**Milano (Milan)**

**Biblioteca dell’Archivio di Stato**

**Dono Galletti, num. 21 (formerly Papadopoli 137) xv**

[Ad Her] trans/para-ital* (Scolari - *Trattatello*)

**Milano (Milan)**

**Biblioteca Nazionale Braidense (Brera)**

**AC X 42 xv**

Ad Her

[Ad Her] s-gl

**Milano (Milan)**

**Biblioteca Nazionale Braidense (Brera)**

**AF IX 23 xv (1462)**

Ad Her

**Milano (Milan)**

**Biblioteca Nazionale Braidense (Brera)**

**AF XIV 11 xv (1462)**

[De inv] comm (Victorinus)

[De inv] comm E (anon *cum sint)*

De inv

[De inv] s-gl

**Milano (Milan)**

**Biblioteca Nazionale Braidense (Brera)**

**AF XIV 18 xv (1434)**

[Ad Her] trans/para-ital* (Guidotto / Giamboni)

**Milano (Milan)**

**Biblioteca Nazionale Braidense (Brera)**

**AG IX 9 xii (Tau [*Archivio italiano per la storia della pietà* 4 (1964) p.270] says xii-xiii; M-O ‘xii ex’)**

De inv incompl

[De inv incompl] s-gl (Francesco da Fiano, **xiv?)**

Ad Her E

[Ad Her E] mi/s-gl(Francesco da Fiano, **xv)**

**Milano (Milan)**

**Biblioteca Trivulziana (= Archivio Storico Civico e Biblioteca Trivulziana)**

**769 xii**

Ad Her extr

**Milano (Milan)**

**Biblioteca Trivulziana (= Archivio Storico Civico e Biblioteca Trivulziana)**

**772 xv**

Ad Her

**Modena**

**Biblioteca Estense (e Universitaria)**

**alpha F.2.55 (lat. 16) xv**

Ad Her

[Ad Her] s-gl

**Modena**

**Biblioteca Estense (e Universitaria)**

**alpha F.5.3 (lat. 714) xv**

[De inv] comm E

[Ad Her E) cn

[Ad Her E) cn

[Ad Her] comm (Jacques de Dinant – ed. Alessio, *Studi Medievali* 3rd ser. 35[1994] 853ff). See also Polak (2015) pp.718-19, esp. fols 66r-82v ‘Inc. (text) ‘Etsi negociis familiaribus inpeditus…’

**Modena**

**Biblioteca Estense (e Universitaria)**

**alpha L.2.28 (lat.1240) xii**

De inv

[De inv] s-gl

**Modena**

**Biblioteca Estense (e Universitaria)**

# alpha M.5.26 (lat. 251) xv

Ad Her

[Ad Her] mi-gl (several hh)

**Modena**

**Biblioteca Estense (e Universitaria)**

# alpha O.6.3 (lat. 161) xv

Ad Her

[Ad Her] mi/s-gl

**Modena**

**Biblioteca Estense (e Universitaria)**

**alpha O.6.29 (lat.160) xv**

[Ad Her] comm E

**Modena**

**Biblioteca Estense (e Universitaria)**

**alpha P.6.17 (lat. 929) xv**

Ad Her

[Ad Her] s-gl (pupil of Guarino da Verona?)

**Modena**

**Biblioteca Estense (e Universitaria)**

**alpha P.6.27 xv**

Ad Her

glossed? If so, the glosses are not included in the survey ch. 4(a)

**Modena**

**Biblioteca Estense (e Universitaria)**

**alpha P.7.11 (lat.73) xv**

Ad Her (note verse at end: ‘Retorice mores hic Tulius atque colores / preparat, hos flores capias qui [quae? qua?] queris honores’!)

**Modena**

**Biblioteca Estense (e Universitaria)**

**alpha P.8.12 (lat.198) xv**

Ad Her

[Ad Her] s-gl

get copy of f.1r, red caped and cowled figure holding a book but not reading…

**Modena**

**Biblioteca Estense (e Universitaria)**

**alpha P.8.15 (lat. 289) xv**

Ad Her

**Modena**

**Biblioteca Estense (e Universitaria)**

**alpha P.9.32 (lat. 87) xvi**

[Ad Her] comm (Alexander Guarinus)

**Modena**

**Biblioteca Estense (e Universitaria)**

**alpha T.7.14 (lat.500) xv**

[De inv / Ad Her] para (‘Rhetoricorum veterum et novorum M.T.Ciceronis conpendium perbreve’)

**Modena**

**Biblioteca Estense (e Universitaria)**

**alpha W.5.9 (lat.325) xv**

Ad Her

**Modena**

**Biblioteca Estense (e Universitaria)**

**Gamma R.2.22 (Camp. App. 167) xv**

Ad Her

[Ad Her] s-gl

**Modena**

**Biblioteca Estense (e Universitaria)**

**Gamma R.4.15 (Camp. App. 169) xv**

Ad Her

[Ad Her] mi-gl

correct / adjust in survey ch. 4(a)

**Modena**

**Biblioteca Estense (e Universitaria)**

# Gamma T.3.13 (Fondo Campori Lat. 1295) xv

[Ad Her] comm (Bartolinus ‘Justinianus Christianissimus…])

**Modena**

**Biblioteca Estense (e Universitaria)**

**Fondo Sorbelli 495 xv**

Ad Her E

[Ad Her E] s-gl

is it xiv-xv? My FC 2 nn say so.

My nn (ON 175 [2] p. 223 give Mazzatinti LIX (Benedello) no.495 p.38 and POKk p.276 gives ‘Bendello’ (a town in its own right, with the Raccolta di Cà d’

Orsolino) as Mazzatinti LIX (and LVII): is Fondo Sorbelli 495 in fact Modena or not? I imagine so as p.223 says what the signature nowadays is and I WAS at Modena library – and Benedello is not Bendello…. Check on Mazzatinti LIX????

**Modena**

**Collegio San Carlo**

**Deposito Collegio San Carlo num. 33 (F.6.5) xv**

Ad Her

[Ad Her] mi-gl (first few folios only)
